# Supplementary material for: Identification of a novel family of carbohydrate-binding modules with broad ligand specificity
Source: PubMed Central journal article supplement (PMC4725902; doi:10.1038/srep19392), 2016-01-14
Supplement: srep19392-s1.pdf [file srep19392-s1.pdf]

## Supplementary Information

### Identification of a novel family of carbohydrate-binding modules with broad ligand specificity

Cheng-Jie Duan<sup>\*</sup>, Yu-Liang Feng, Qi-Long Cao, Ming-Yue Huang, Jia-Xun Feng<sup>\*</sup>

#### Supplementary files provided with this submission:

**Figure S1.** Construction and binding capacity of three CBM<sub>C5614-1</sub> deletion mutants.

**Figure S2.** The circular dichroism spectra of CBM<sub>C5614-1</sub> and its variants.

**Table S1.** Primer pairs used in this work.

**Table S2.** The secondary structure about CBM<sub>C5614-1</sub> and its variants, the data was analyzed using K2D by Dicroprot.

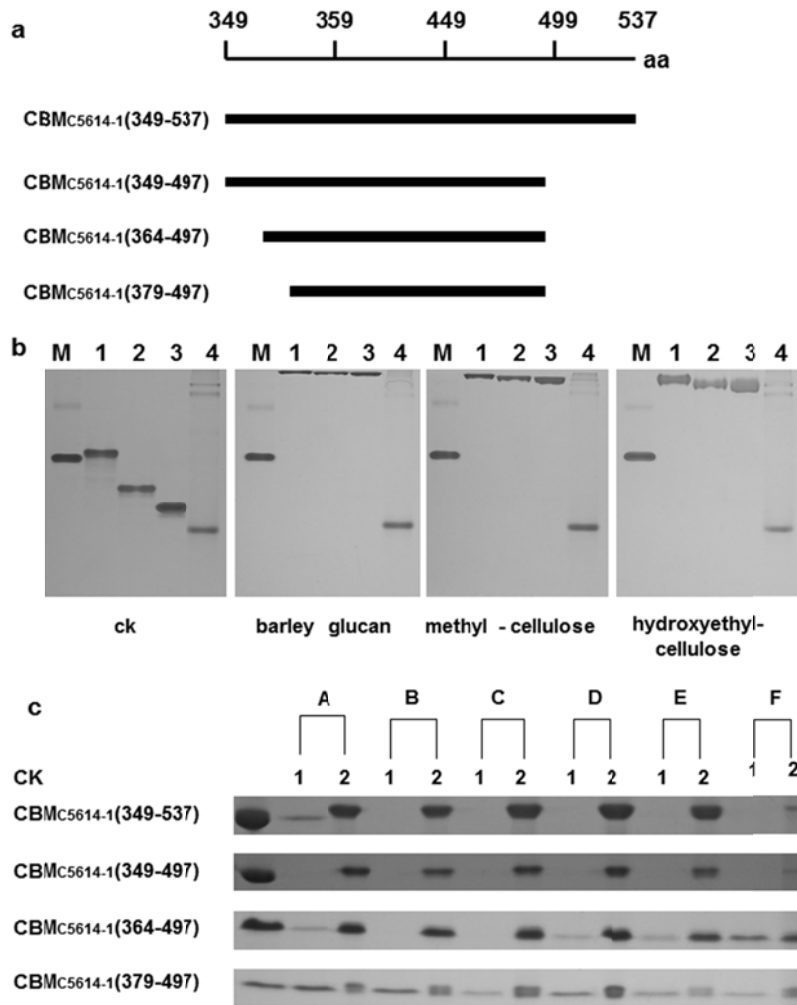

**Figure S1. Construction and binding capacity of three  $CBM_{C5614-1}$  deletion mutants.**  
a: Construction of  $CBM_{C5614-1}$  deletion mutants. Numbers in brackets refer to the amino acid sequence of the source enzyme C5614-1 of  $CBM_{C5614-1}$ .  
b: Binding of  $CBM_{C5614-1}$  deletion mutants to soluble polysaccharides. Proteins and BSA were separated using non-denaturing polyacrylamide gels containing 0.1% (wt/vol) soluble polysaccharides. A gel without polysaccharides served as a control (CK). Lane M, BSA (negative control); Lane 1, wild type  $CBM_{C5614-1}$  (349-537) (positive control). Lane 2,  $CBM_{C5614-1}$  (349-497); Lane 3,  $CBM_{C5614-1}$  (364-497); Lane 4,  $CBM_{C5614-1}$  (379-497).  
c: Binding of  $CBM_{C5614-1}$  deletion mutants to insoluble polysaccharides. Deletion mutants were incubated for 4 h with insoluble polysaccharides in the form of Avicel (A), ASC (B), insoluble birch wood xylan (C), mannan (D), lichenan (E) and raw starch from cassava (F). The same amount of protein used in the binding assay but without polysaccharide was included as a control (CK). After centrifugation, unbound protein in the supernatant (lane 1) and bound proteins in the precipitate (lane 2) were analyzed by SDS-PAGE.

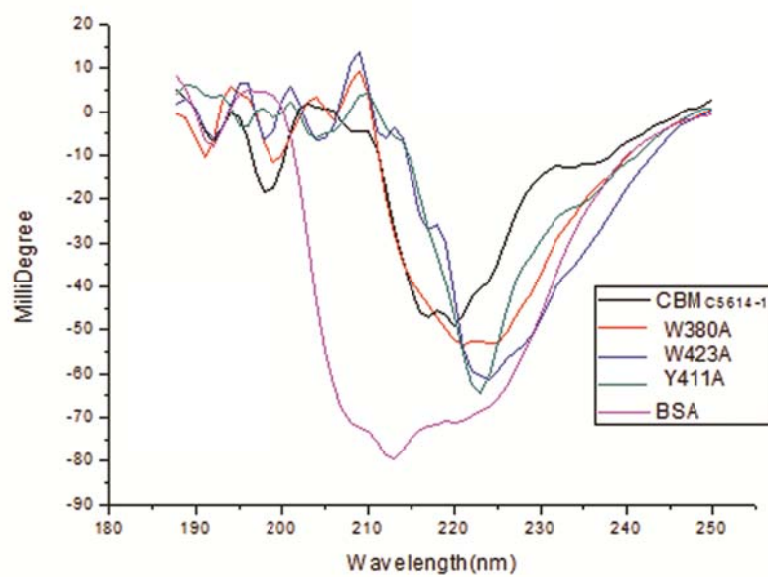

**Figure S2. The circular dichroism spectra of CBM<sub>C5614-1</sub> and its variants.** The circular dichroism spectra were recorded as described under “Materials and Methods.”

**Table S1 Primer pairs used in this work.**

| Primer pairs                                                         | Sequence (5' to 3')                                                        | Product/product length                       |
|----------------------------------------------------------------------|----------------------------------------------------------------------------|----------------------------------------------|
| CBM <sub>C5614-1</sub> F1/<br>CBM <sub>C5614-1</sub> R1              | GGGCATATGAAAGCCTATCATGGCAGCGCGTTC/<br>GACCTCGAGTTGTGCTATGTATTTTTGCCGTTCTGG | CBM <sub>C5614-1(349-537)</sub> /564 bp      |
| CBM <sub>C5614-1</sub> F1/<br>CBM <sub>C5614-1</sub> 1-149 R1        | As above/GACCTCGAGTGCTGACGTACCGGAAGGTGCT<br>CTTA                           | CBM <sub>C5614-1(349-497)</sub> /447 bp      |
| CBM <sub>C5614-1</sub> 16-149 F1/<br>CBM <sub>C5614-1</sub> 1-149 R1 | AGCCATATGGATTCTTCGAAGGGTACTGTTGCTTTTG<br>/as above                         | CBM <sub>C5614-1(364-497)</sub> /402bp       |
| CBM <sub>C5614-1</sub> 31-149F1/<br>CBM <sub>C5614-1</sub> 1-149 R1  | AGCCATATGGAATGGGGAGAAGGCGTGTTCGTTC/As<br>above                             | CBM <sub>C5614-1(379-497)</sub> /357bp       |
| CBM <sub>C5614-1</sub> F372AF1/<br>CBM <sub>C5614-1</sub> 1-149R1    | AGGCATATGGATTCTTCGAAGGGTACTGTTGCTGCAGA<br>AGGCGAGAAGAC/as above            | Mutant F372A/402 bp                          |
| CBM <sub>C5614-1</sub> 16-149F1/<br>CBM <sub>C5614-1</sub> W380FR1   | As above/GAACACGCCTTCTCTGCTTCCAACGTCTTCT<br>CGCCTT                         | Forward fragment of<br>mutantW380A/66 bp     |
| CBM <sub>C5614-1</sub> W380AF1/<br>CBM <sub>C5614-1</sub> 1-149 R1   | AAGGCGAGAAGACGTTGGAAGCAGGAGAAGGCGTGT<br>TC/As above                        | Backward fragment of<br>mutantW380A/374 bp   |
| CBM <sub>C5614-1</sub> 16-149F1/<br>CBM <sub>C5614-1</sub> Y404AR1   | As above/TCGGTGAAGTCGAGTTTTGCGGTCAGTTCTAC<br>TTCCAC                        | Forward fragment of<br>mutantY404A/140 bp    |
| CBM <sub>C5614-1</sub> Y404AF1/<br>CBM <sub>C5614-1</sub> 1-149 R1   | GTGGAAGTAGAACTGACCGCAAACTCGACTTCACCG<br>A/As above                         | Backward fragment of<br>mutantY41A /300 bp   |
| CBM <sub>C5614-1</sub> 16-149F1/C<br>BM <sub>C5614-1</sub> F408AR1   | As above/TATCATCATAGTCGGTTGCGTCGAGTTTATA<br>GGTCAGTTC                      | Forward fragment of<br>mutantF408A / 151 bp  |
| CBM <sub>C5614-1</sub> F408AF1/<br>CBM <sub>C5614-1</sub> 1-149 R1   | GAACTGACCTATAAACTCGACGCAACCGACTATGATGA<br>TA /As above                     | Backward fragment of<br>mutantF408A / 291 bp |
| CBM <sub>C5614-1</sub> 16-149F1/<br>CBM <sub>C5614-1</sub> Y411FR1   | As above/CATGAACTGAATATCATCTGCGTCGGTGAAG<br>TCGAGTTTATAGG                  | Forward fragment of<br>mutant Y411A/ 162 bp  |
| CBM <sub>C5614-1</sub> Y411AF1 /<br>CBM <sub>C5614-1</sub> 1-149 R1  | CCTATAAACTCGACTTCACCGACGCAGATGATATTCAG<br>TTCATG /As above                 | Backward fragment of<br>mutant Y411A/284 bp  |
| CBM <sub>C5614-1</sub> 16-149F1/<br>CBM <sub>C5614-1</sub> F416AR1   | As above/CCATTATTATACATAGCCTGAATATCATCAT<br>AGTCGGTGAAGTCGAG               | Forward fragment of<br>mutant F416A/ 173 bp  |
| CBM <sub>C5614-1</sub> F416AF1/C<br>BM <sub>C5614-1</sub> 1-149 R1   | CTCGACTTCACCGACTATGATGATATTCAGGCTATGTAT<br>AATAATGG /As above              | Backward fragment of<br>mutant F416A/278 bp  |
| CBM <sub>C5614-1</sub> 16-149F1/<br>CBM <sub>C5614-1</sub> Y418AR1   | As above/TCCACCATTATTATACATAGCCTGAATATCAT<br>CATAGTCGGTGAA                 | Forward fragment of<br>mutant Y418A/ 183 bp  |
| CBM <sub>C5614-1</sub> Y418AF1/<br>CBM <sub>C5614-1</sub> 1-149 R1   | TTCACCGACTATGATGATATTCAGGCTATGTATAATAAT<br>GGTGGA /As above                | Backward fragment of<br>mutant Y418A/270 bp  |
| CBM <sub>C5614-1</sub> 16-149F1/C<br>BM <sub>C5614-1</sub> W423AR1   | As above/GAAAGACCACTGGGTATCTTCTGTGCTCCAC<br>CATTATTATAC                    | Forward fragment of<br>mutant W423A/ 203 bp  |
| CBM <sub>C5614-1</sub> W423AF1/<br>CBM <sub>C5614-1</sub> 1-149 R1   | TAATGGTGGAGCACAGAAGATACCCAGTGGTCTTTC<br>/As above                          | Backward fragment of<br>mutant W423A/ 235 bp |

|                                                                    |                                                         |                                                      |
|--------------------------------------------------------------------|---------------------------------------------------------|------------------------------------------------------|
| CBM <sub>C5614-1</sub> 16-149F1/<br>CBM <sub>C5614-1</sub> F462AR1 | As above/CCATAAGCCGAGGCATCT <u>GCAGT</u> CAAGACCG<br>AT | Forward fragment of<br>mutant <i>F462A</i> / 314 bp  |
| CBM <sub>C5614-1</sub> F462AF1/<br>CBM <sub>C5614-1</sub> 1-149 R1 | ATCGGTCTTGACT <u>GCAGAT</u> GCCTCGGCTTATGG/As<br>above  | Backward fragment of<br>mutant <i>F462A</i> / 121 bp |
| CBM <sub>C5614-1</sub> 16-149F1/<br>CBM <sub>C5614-1</sub> Y467AR1 | As above/AGAAACATATCCT <u>GCAGCCGAGGCAT</u> CGAAG<br>TC | Forward fragment of<br>mutant <i>Y467A</i> /324 bp   |
| CBM <sub>C5614-1</sub> Y467AF1/<br>CBM <sub>C5614-1</sub> 1-149 R1 | GACTTTCGATGCCTCGGCT <u>GCAGGAT</u> ATGTTTCT/As<br>above | Backward fragment of<br>mutant <i>Y467A</i> /112 bp  |

Added restriction sites are underlined.

The mutant codons are shown in bold.

**Table S2. The secondary structure about CBM<sub>C5614-1</sub> and its variants, the data was analyzed using K2D by Dicroprot.**

| Folding type | BSA   | CBM <sub>C5614-1</sub> | W380A | Y411A | W423A |
|--------------|-------|------------------------|-------|-------|-------|
| ALPHA        | ≥0.30 | ≥0.08                  | ≥0.07 | ≥0.06 | ≥0.05 |
| BETA         | ≥0.13 | ≥0.44                  | ≥0.46 | ≥0.47 | ≥0.47 |
| RANDOM       | ≥0.56 | ≥0.48                  | ≥0.48 | ≥0.48 | ≥0.48 |
